# Supplementary material for: Effects of probucol on cell proliferation in human ovarian cancer cells
Source: Royal Society of Chemistry journal article supplement (doi:10.1039/c5tx00088b), 2015-12-10
Supplement: c5tx00088b1.pdf [file c5tx00088b1.pdf]

## Supplemental Figure 1

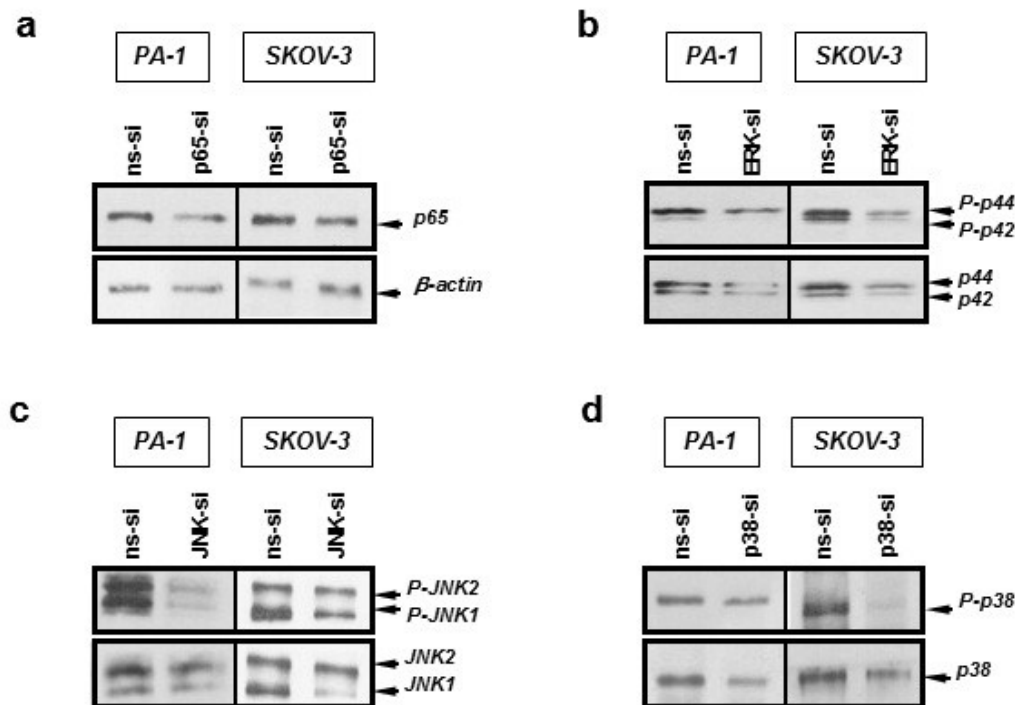

**Supplemental Figure 1** Knockdown of p65, ERK, JNK and p38 MAPK by specific siRNAs in PA-1 and SKOV-3 cells. PA-1 and SKOV-3 cells were transfected with 50 nM siRNA against p65, ERK, JNK and p38 MAPK or a non-silencing RNA (ns) for 3 d, respectively. Following a brief period of serum deprivation, 10% FBS was added for 12 h prior to protein extraction and Western blot analysis for p65 (a), ERK (b), JNK (c), and p38 MAPK (d).  $\beta$ -actin was used as a loading control. This is a representative experiment independently performed three times in PA-1 and SKOV-3 cells.
