# Supplementary material for: Effects of probucol on cell proliferation in human ovarian cancer cells
Source: Royal Society of Chemistry journal article supplement (doi:10.1039/c5tx00088b), 2015-12-10
Supplement: c5tx00088b2.pdf [file c5tx00088b2.pdf]

## Supplemental Figure 2

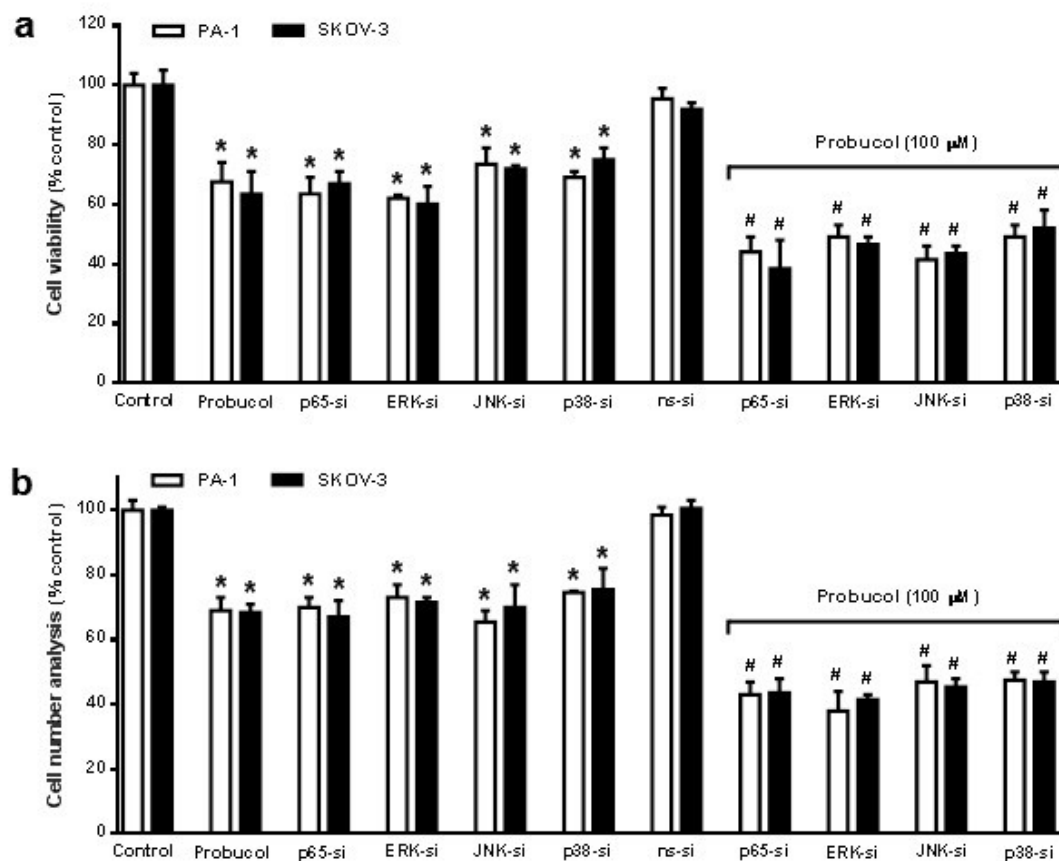

**Supplemental Figure 2** Effects of probucol, p65 siRNA, ERK siRNA, JNK siRNA and p38 MAPK siRNA on cellular mitogenesis in PA-1 and SKOV-3 cells. Serum-deprived cells were treated with 10% FBS (control), probucol (100  $\mu$ M), p65 siRNA (50 nM), ERK siRNA (50 nM), JNK siRNA (50 nM), p38 MAPK siRNA (50 nM), non-silencing RNA (ns), probucol + p65 siRNA, probucol + ERK siRNA, probucol + JNK siRNA, or probucol + p38 MAPK siRNA in the presence of 10% FBS (control) for 3 d. Assayed for cell viability (a) and cell numbers (b) were performed. The fact that knockdown of p65, ERK, JNK and p38 MAPK by specific siRNAs caused marked drop in cellular mitogenesis further implicate close relationship between NF- $\kappa$ B and ERK/JNK/p38 MAPK signaling pathways in growth control. Additionally, growth inhibition was enhanced by probucol plus each specific siRNAs in these cells. Results were expressed as the mean  $\pm$  SEM (n = 6). \**p* < 0.05 versus control; #*p* < 0.05 versus probucol.
